# Supplementary material for: Highly efficient inverted organic light-emitting diodes using composite organic heterojunctions as electrode-independent injectors
Source: Royal Society of Chemistry journal article supplement (doi:10.1039/c6tc02842j), 2016-01-01
Supplement: c6tc02842j1.pdf [file c6tc02842j1.pdf]

## Supplementary Information

### Highly efficient inverted organic light-emitting diodes using composited organic heterojunction as electrode-independent injectors

**Supporting Information (Figure S1)** To elaborate the role of intrinsic TAPC and m-MTDATA in the p/bulkjunction/n structure, we also fabricated two heterojunction devices without intrinsic TAPC and m-MTDATA layer, as shown **Figure S1**. We find that the current density without intrinsic TAPC and m-MTDATA is larger than the devices with intrinsic TAPC and m-MTDATA. This further indicates intrinsic TAPC and m-MTDATA layer in the heterojunction plays the role of reducing leak current of IOLEDs and preventing electrons injection from ITO cathode due to their

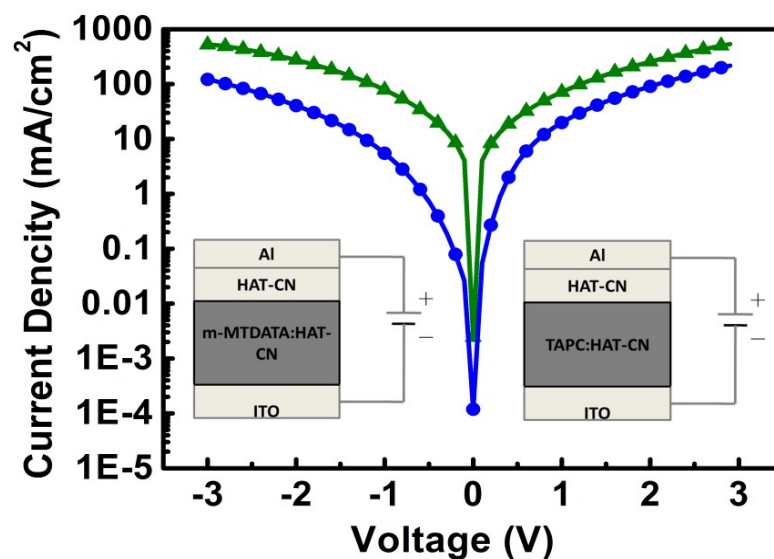

high LUMO level.

**Figure S1:** Current density versus voltage characteristics (I-V) of ITO/ m-MTDATA:HAT-CN (2:1, 60 nm)/HAT-CN (10 nm)/Al (green triangles) and ITO/ TAPC:HAT-CN(2:1, 60 nm)/HAT-CN (10 nm)/Al (blue circles). The inset shows the schematic illustration of two devices. The forward bias refers to ITO as cathode and Al as anode, and reverse bias refers to ITO as anode and Al as cathode.

**Supporting Information (Figure S2)** The surface morphologies of intrinsic m-MTDATA films in p/bulkjunction/n

were measured by tapping-mode atomic force microscopy (AFM), as shown in Figure S2. The roughness mean square (RMS) values were 2.79 nm, 3.10 nm and 2.85 nm for the m-MTDATA films. The roughness is small than the total thickness of 10nm m-MTDATA, values were 2.79 nm, 3.10 nm and 2.85 nm for the m-MTDATA films. The roughness is small than the total thickness of 10nm m-MTDATA, we believe a 10 nm of m-MTDATA can fully cover the cathodes. This indicates 10nm of m-MTDATA film in p/bulkjunction/n can prevent the direct contact of m-MTDATA:HAT-CN and ITO cathodes, so the electrons can't be injected from the three different ITO cathodes due to the high LUMO of intrinsic m-MTDATA.

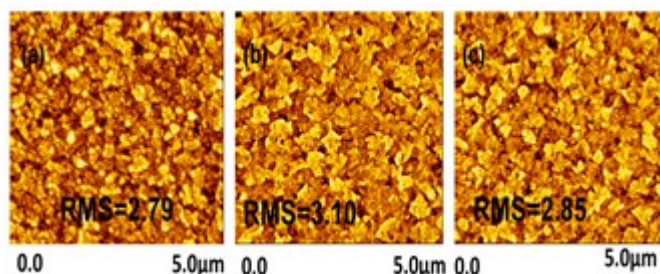

Figure S2 Surface morphologies of m-MTDATA film on the three different ITO cathode, and three different ITO cathode refers to (a) without UV-O3 treatment, (b) with UV-O3 treatment, (c) Introduction of a thin Al layer.

**Supporting Information (Table 2)** Summaries of the electroluminescence performance of red and blue IOLEDs for different cases

| Device | V <sub>on</sub> (V) | PE <sup>a,b</sup> (lm/W) | CE <sup>a,b</sup> (cd/A) | EQE <sup>a,b</sup> (%) |
|--------|---------------------|--------------------------|--------------------------|------------------------|
| R1     | 2.4                 | 27.2,23.0                | 25.0,24.8                | 14.1,14.0              |
| R2     | 2.4                 | 26.1,22.0                | 24.0,23.9                | 13.9,13.8              |
| R3     | 2.4                 | 26.9,23.0                | 24.7,24.0                | 14.0,13.9              |
| F1     | 2.8                 | 37.5,23.0                | 34.8,27.0                | 14.3,11.0              |
| F2     | 2.8                 | 38.5,21.0                | 36.4,,26.0               | 14.7,10.5              |
| F3     | 2.8                 | 40.8,24.0                | 36.4,27.0                | 14.0,10.4              |

a refers to The maximum PE, CE, and EQE; b refers to PE, CE, EQE at the luminance of 1000
